# Supplementary material for: Morphology control of CoCO3 crystals and their conversion to mesoporous Co3O4 for alkaline rechargeable batteries application
Source: Royal Society of Chemistry journal article supplement (doi:10.1039/c3ce40722e), 2013-01-01
Supplement: c3ce40722e.pdf [file c3ce40722e.pdf]

## Supporting Information

### Morphology control of $\text{CoCO}_3$ Crystals and Their Conversion to mesoporous $\text{Co}_3\text{O}_4$ for Alkaline Rechargeable Batteries Application

Hongmei Du, Lifang Jiao,\* Qinghong Wang, Qingna Huan, Lijing Guo, Yuchang Si, Yijing Wang, and Huatang Yuan

*Institute of New Energy Material Chemistry, Key Laboratory of Advanced Energy Materials Chemistry (MOE), Nankai University, Tianjin 300071, P.R. China, Tel.: +86 22 23498089; fax: +86 22 23502604; E-mail: [jiaolf@nankai.edu.cn](mailto:jiaolf@nankai.edu.cn).*

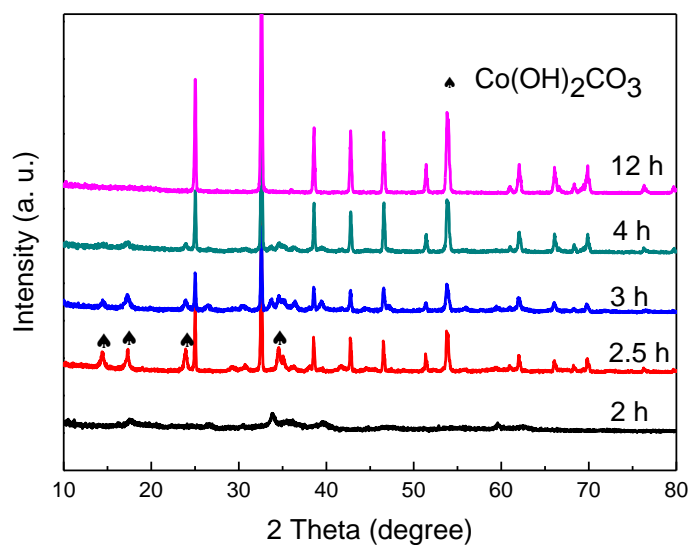

**Figure S1.** XRD patterns of the  $\text{CoCO}_3$  crystals prepared at different reaction times.

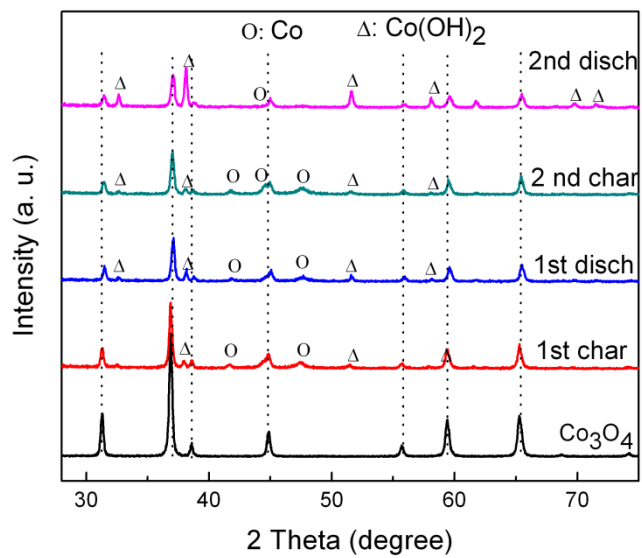

Figure S2. Enlarged XRD patterns of sample S4-5 at different charged-discharged states.

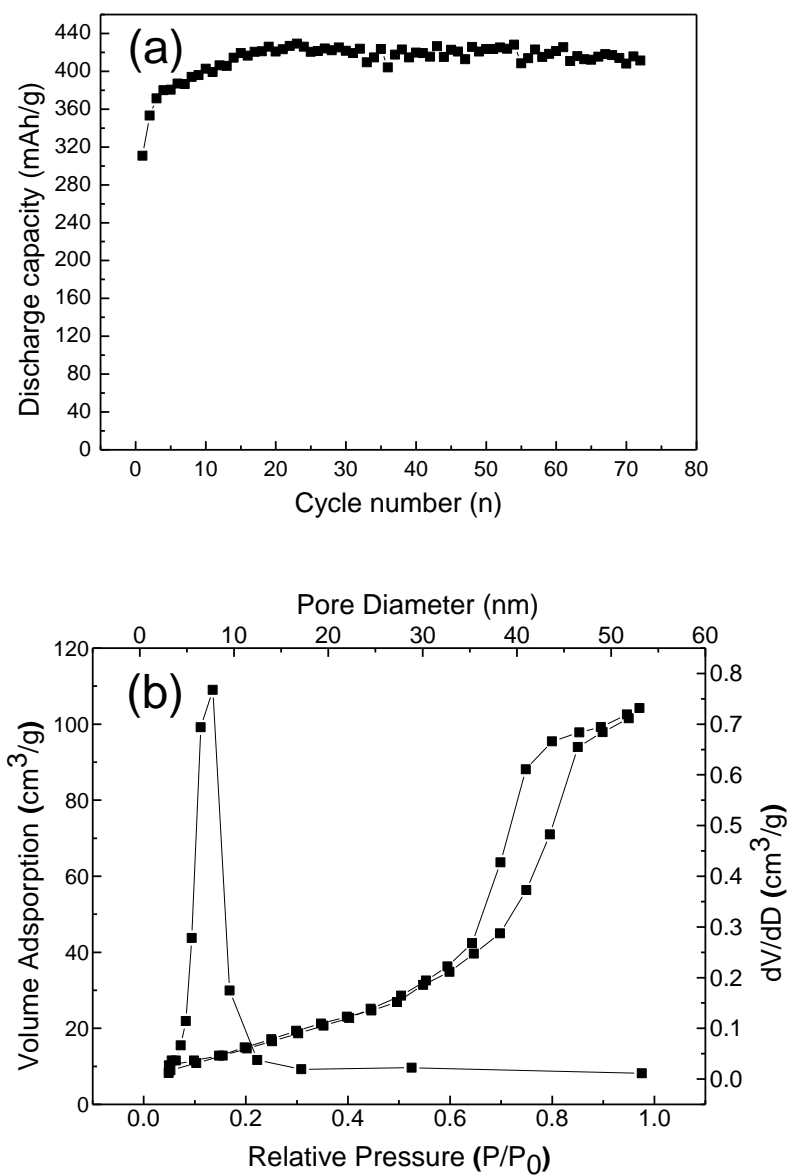

**Figure S3.** (a) Cycle life of sample S4-4 (EG/H<sub>2</sub>O=4/1, 400 °C) electrode at a current density of 100 mA g<sup>-1</sup>; (b) N<sub>2</sub> adsorption-desorption isotherm and BJH pore-size distribution plot of sample S4-4.
